# Supplementary material for: TLR9 Binding to Beclin 1 and Mitochondrial SIRT3 by a Sodium-Glucose Co-Transporter 2 Inhibitor Protects the Heart from Doxorubicin Toxicity
Source: PubMed Central journal article supplement (PMC7693736; doi:10.3390/biology9110369), 2020-10-29
Supplement: biology-09-00369-s001.pdf [file biology-09-00369-s001.pdf]

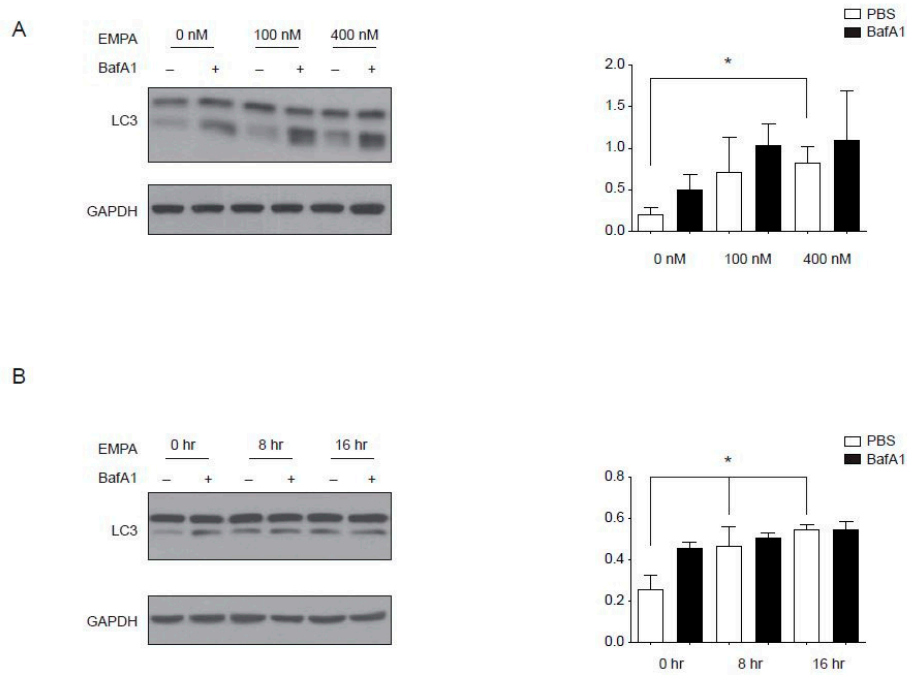

**Figure S1. Sodium-glucose co-transporter 2 inhibition increases the autophagic flux in cardiomyocytes.** **A.** Dose-dependent changes in LC3-II/I ratio after empagliflozin treatment in neonatal cardiomyocytes with or without BafA1 ( $n = 3$  per group. \*  $p < 0.05$ , data were analyzed by one-way analysis of variance (ANOVA) with Dunnett post hoc analysis). **B.** Time-dependent changes in LC3-II/I ratio after empagliflozin treatment in neonatal cardiomyocytes with or without BafA1 ( $n = 3$  per group. \*  $p < 0.05$ , data were analyzed by one-way analysis of variance (ANOVA) with Dunnett post hoc analysis).

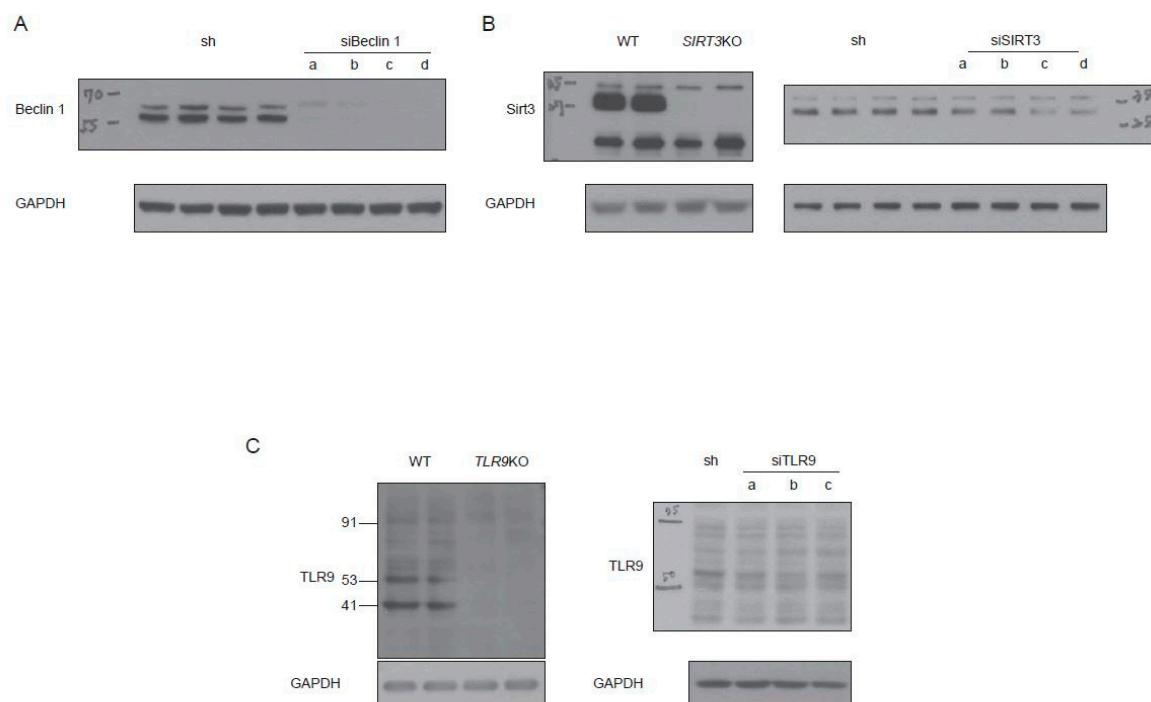

**Figure S2. Verification of antibody and efficiency of siBeclin 1, siSirt3, and siTLR9.** **A.** Beclin 1 blotting of cardiomyocytes with sh or siBeclin 1 knockdown treatments. **B.** Left: SIRT3 blotting of hearts from wild-type (WT) and *SIRT3*KO mice. Right: SIRT3 blotting of cardiomyocytes with sh or siSIRT3 knockdown treatments. **C.** Left: TLR9 blotting of hearts from wild-type (WT) and *TLR9*KO mice. Right: TLR9 blotting of cardiomyocytes with sh or siTLR9 knockdown treatments.

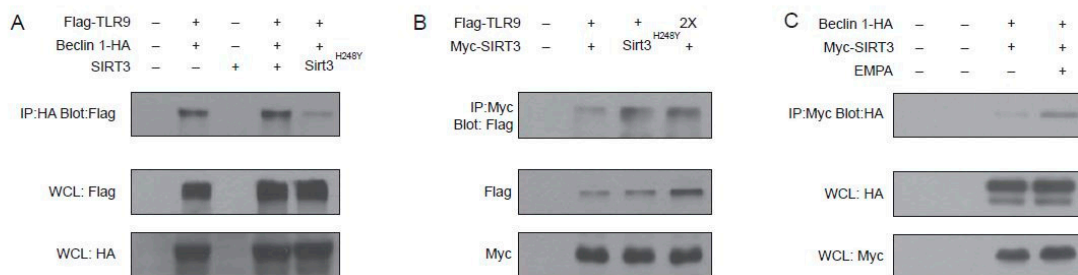

**Figure S3. SIRT3 increased Beclin 1 and TLR9 bindings.** **A.** Coimmunoprecipitation of Beclin 1 with TLR9 or TLR9 with Beclin 1 from 293 cells with or without empagliflozin (200 nM) treatment. Western blot analysis of 293 whole-cell extracts transfected with Flag-TLR9 and Beclin 1-HA and immunoprecipitated with Beclin 1-HA (lane 1) or Flag-TLR9 (lane 2). **B.** Coimmunoprecipitation of Beclin 1-HA with Flag-TLR9 from 293 cells with SIRT3 or SIRT3<sup>H248Y</sup>. Western blot analysis of 293

whole-cell extracts transfected with Flag-TLR9 and Beclin 1-HA with SIRT3 or SIRT3<sup>H248Y</sup> and immunoprecipitated with HA-Beclin 1 (lane 1). C. TLR9 interacted with SIRT3 *in vitro*. Flag-TLR9, Myc-SIRT3, and Myc-SIRT3<sup>H248Y</sup> were immunoprecipitated and prepared from 293 cells and used for *in vitro* binding assay. The interactions were analyzed by immunoblotting for Flag-tagged proteins. D. Coimmunoprecipitation of Beclin 1-HA with Myc-SIRT3 in 293 cells with or without empagliflozin (200 nM) treatment. Western blot analysis of 293 whole-cell extracts transfected with HA-Beclin 1 and Myc-SIRT3 and immunoprecipitated with Myc-SIRT3 (lane 1).

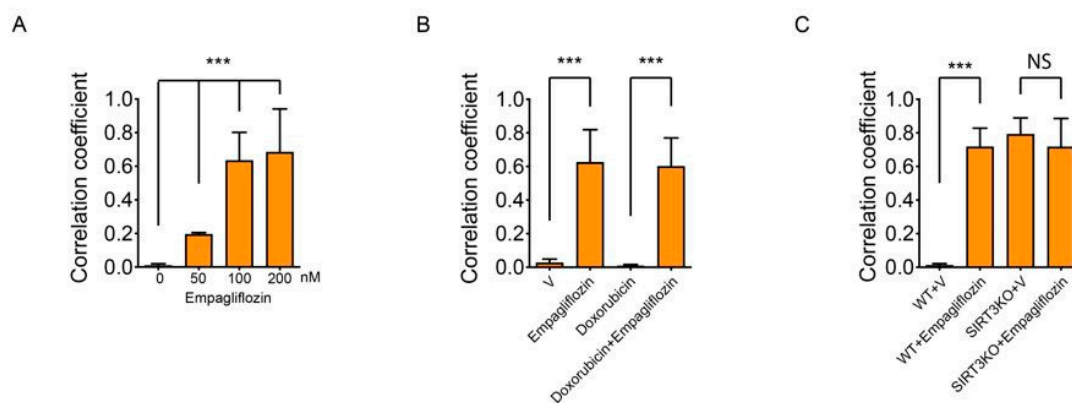

**Figure S4. Colocalization analysis of overexpressed GFP-TLR9 and mitochondria stained with Mitotracker Deep Red FM.** **A.** AC16 human cardiomyocytes stained for mitochondria and overexpressed GFP-TLR9. Cells were treated with indicated doses of empagliflozin before imaging and analyzed with Pearson's correlation coefficients of images of red mitochondria and GFP-TLR9 in AC16 human cardiomyocytes. ( $n = 4$  experiments and 100 cells per experiment, \*\*\*  $p < 0.001$ , data were analyzed by the one-way ANOVA). **B.** AC16 human cardiomyocytes stained for mitochondria and overexpressed GFP-TLR9. Cells were treated with 200nM empagliflozin or 1  $\mu$ M doxorubicin before imaging and analyzed with Pearson's correlation coefficients of images of red mitochondria and GFP-TLR9 in AC16 human cardiomyocytes. ( $n = 4$  experiments and 100 cells per experiment, \*\*\*  $p < 0.001$ , data were analyzed by the two-way analysis of variance (ANOVA) with Tukey post hoc analysis). **C.** WT and SIRT3 KO cells stained for mitochondria (red) and GFP-TLR9. Cells were treated with 200 nM empagliflozin before imaging and analyzed with Pearson's correlation coefficients of images of red mitochondria and GFP-TLR9 in AC16 human cardiomyocytes. ( $n = 4$  experiments and 100 cells per experiment, \*\*\*  $p < 0.001$ , NS, not significant, data were analyzed by the two-way analysis of variance (ANOVA) with Tukey post hoc analysis).

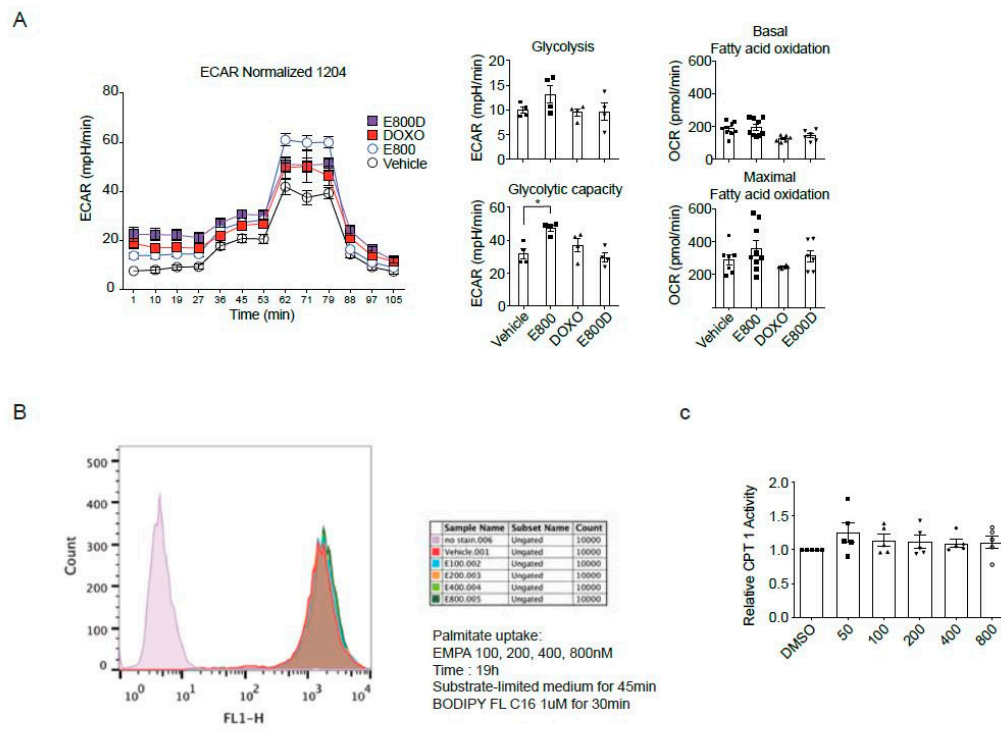

**Figure S5. Glycolysis, Fatty acid uptake, and CPT 1 activity in cardiomyocytes after empagliflozin treatment.** **A.** Glycolysis, basal fatty acid oxidation, glycolytic capacity, and maximal fatty acid oxidation analyzed by Seahorse instruments ( $n = 4-9$ ,  $* p < 0.05$ , data were analyzed by the one-way ANOVA with Tukey post hoc analysis). **B.** Palmitate uptake in the neonatal cardiomyocytes after empagliflozin treatments analyzed by BODIPY FL C<sub>16</sub> lipid probes. **C.** Carnitine acyltransferase activity in neonatal cardiomyocytes after empagliflozin treatment ( $n = 5$ , data were analyzed by the one-way ANOVA with Tukey post hoc analysis).

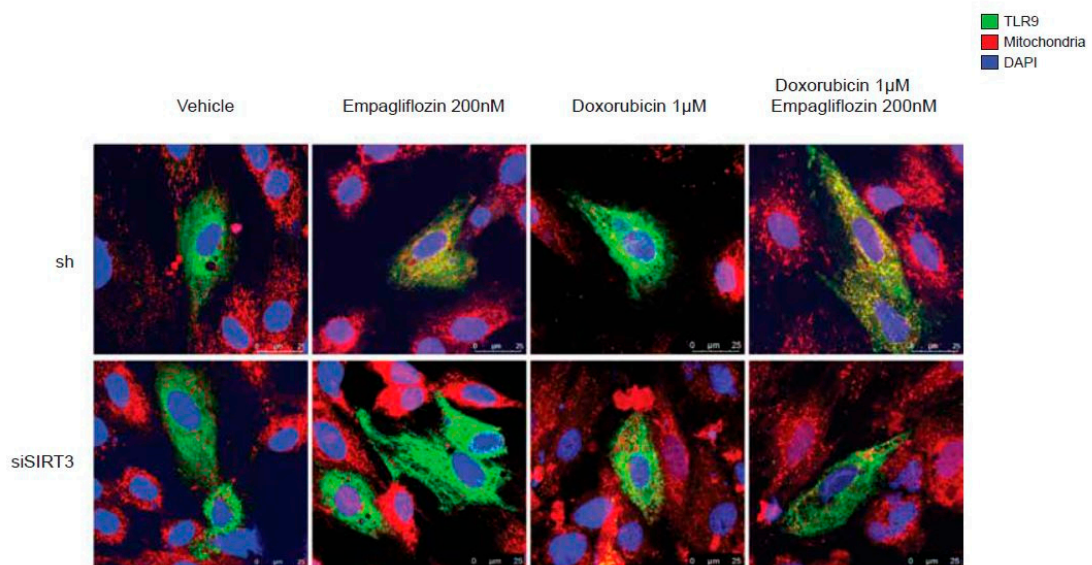

**Figure S6. SIRT3 knockdown and TLR9 abundances after empagliflozin treatment in cardiomyocytes.** Images of neonatal cardiomyocytes treated with sh or siSIRT3 RNA and stained for

mitochondria (red), nucleus (blue), and TLR9 (green). Cells were treated with empagliflozin (200 nM) or doxorubicin (1 $\mu$ M) before imaging.

**Table S1.** siRNA and Real time PCR primer sequences.

| Gene                       | Primer Sequence             |
|----------------------------|-----------------------------|
| Rat <i>Beclin 1</i> siRNA  | 5'-CGUACAGGAUGGACGUGGA-3'   |
| rat <i>TLR9</i> siRNA 1    | 5'-AACCUGAGCUAUAACGGUA-3'   |
| rat <i>TLR9</i> siRNA 2    | 5'-CUGACUGGGUGUAUAACGA-3'   |
| human <i>TLR9</i> siRNA 1  | 5'-CGGCAACUGUUUUACAAG-3'    |
| human <i>TLR9</i> siRNA 2  | 5'-ACAAUAAGCUGGACCUCUA-3'   |
| human <i>SIRT3</i> siRNA 1 | 5'-UUGAGAGAGUGUCGGGCAU-3'   |
| human <i>SIRT3</i> siRNA 2 | 5'-GGACCAGACAAAUAGGAUG-3'.  |
| <i>mBNP</i> , Forward      | 5'-CAGCTCTTGAAGACCAAGG-3'   |
| <i>mBNP</i> , Reverse      | 5'-AGACCCAGGCAGAGTCAGAA-3'; |
| <i>mCol1a1</i> , Forward   | 5'-GCTCCTCTTAGGGGCCACT-3'   |
| <i>mCol1a1</i> , Reverse   | 5'-ATTGGGGACCCTTAGGCCAT-3'  |
| <i>mTP53</i> , Forward     | 5'-CTCTCCCCCGCAAAGAAAAA-3'  |
| <i>mTP53</i> , Reverse     | 5'-CGGAACATCTCGAAGCGTTA-3'  |

**Publisher's Note:** MDPI stays neutral with regard to jurisdictional claims in published maps and institutional affiliations.

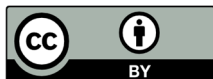

© 2020 by the author. Licensee MDPI, Basel, Switzerland. This article is an open access article distributed under the terms and conditions of the Creative Commons Attribution (CC BY) license (<http://creativecommons.org/licenses/by/4.0/>).
